# Supplementary material for: Association of Plasma Metabolites and Salt Sensitivity of Blood Pressure in Chinese Population: The EpiSS Study
Source: MDPI journal article supplement (doi:10.3390/nu15030690), 2023-01-30
Supplement: s1 [file s1]

---

**Supplementary Materials***Article*

# **Association of Serum Metabolites and Salt Sensitivity of Blood Pressure in Chinese Population: The EpiSS Study**

Fengxu Zhang <sup>†</sup>, Yunyi Xie <sup>†</sup>, Xiaojun Yang, Wenjuan Peng, Han Qi, Bingxiao Li, Fuyuan Wen, Pandi Li, Yuan Sun and Ling Zhang <sup>\*</sup>

## **Table of Contents**

|                                                                                           |   |
|-------------------------------------------------------------------------------------------|---|
| Table S1. Annotated serum metabolites associated with SS relative to SR .....             | 2 |
| Table S2. Metabolic pathway analysis of differential metabolites between SS and SR .....  | 4 |
| Table S3. Results of metabolites related logistic regression models for SS. ....          | 6 |
| Table S4. ROC analysis of SS. ....                                                        | 8 |
| Figure S1. Metabolic pathway analysis of differential metabolites between SS and SR ..... | 9 |

**Table S1.** Annotated serum metabolites associated with SS relative to SR. The results are based on the differential expression analysis on the comparisons of metabolites predicted to be differentially expressed based on cut-offs of adjusted p value < 0.05 and absolute log2 fold change > 0.3.

| Metabolite              | Super Pathway         | Sub Pathway                    | P     | Log2(FC) | VIP  | Regulation |
|-------------------------|-----------------------|--------------------------------|-------|----------|------|------------|
| TG 54:6                 | Triacylglycerol       | Triglyceride metabolism        | 0.006 | 0.80     | 2.08 | Up         |
| GlcCer d41:1            | Glycosphingolipid     | Sphingolipid metabolism        | 0.017 | -0.31    | 1.07 | Down       |
| ChE 22:5n6              | Cholesterol esters    | Steroid biosynthesis           | 0.002 | -0.65    | 1.92 | Down       |
| ChE 20:3                | Cholesterol esters    | Steroid biosynthesis           | 0.004 | -0.48    | 1.62 | Down       |
| ChE 22:4                | Cholesterol esters    | Steroid biosynthesis           | 0.005 | -0.48    | 1.54 | Down       |
| ChE 18:0                | Cholesterol esters    | Steroid biosynthesis           | 0.028 | -0.52    | 1.45 | Down       |
| ChE 22:5n3              | Cholesterol esters    | Steroid biosynthesis           | 0.048 | -0.33    | 1.13 | Down       |
| PC 32:1p                | Glycerophosphocholine | Glycerophospholipid metabolism | 0.004 | -0.30    | 1.32 | Down       |
| PC 16:0/16:1            | Glycerophosphocholine | Glycerophospholipid metabolism | 0.007 | -0.61    | 1.90 | Down       |
| PC 16:1/14:0            | Glycerophosphocholine | Glycerophospholipid metabolism | 0.007 | -1.33    | 2.77 | Down       |
| PC 38:3e                | Glycerophosphocholine | Glycerophospholipid metabolism | 0.008 | -0.35    | 1.29 | Down       |
| PC 17:1/14:0            | Glycerophosphocholine | Glycerophospholipid metabolism | 0.009 | -0.93    | 2.26 | Down       |
| PC 16:0/18:1            | Glycerophosphocholine | Glycerophospholipid metabolism | 0.010 | -0.31    | 1.34 | Down       |
| PC 30:0                 | Glycerophosphocholine | Glycerophospholipid metabolism | 0.010 | -0.61    | 1.90 | Down       |
| PC 30:1e                | Glycerophosphocholine | Glycerophospholipid metabolism | 0.010 | -0.40    | 1.44 | Down       |
| PC 18:0p/14:0           | Glycerophosphocholine | Glycerophospholipid metabolism | 0.012 | -0.31    | 1.16 | Down       |
| PC 14:0/18:2            | Glycerophosphocholine | Glycerophospholipid metabolism | 0.020 | -0.40    | 1.34 | Down       |
| PC 15:0/14:0            | Glycerophosphocholine | Glycerophospholipid metabolism | 0.022 | -0.86    | 2.11 | Down       |
| PC 17:1/16:0            | Glycerophosphocholine | Glycerophospholipid metabolism | 0.032 | -0.38    | 1.36 | Down       |
| PC 20:4/22:6            | Glycerophosphocholine | Glycerophospholipid metabolism | 0.034 | -0.37    | 1.38 | Down       |
| Sphingosine 1-phosphate | Phosphosphingolipids  | Sphingolipid metabolism        | 0.009 | 0.59     | 1.60 | Up         |
| AcCa 20:3               | Acylcarnitine         | Fatty acid metabolism          | 0.002 | -0.54    | 1.78 | Down       |
| AcCa 20:2               | Acylcarnitine         | Fatty acid metabolism          | 0.016 | -0.37    | 1.30 | Down       |
| AcCa (5:0)              | Acylcarnitine         | Fatty acid metabolism          | 0.029 | -0.32    | 1.00 | Down       |

|                                    |                      |                                        |       |       |      |      |
|------------------------------------|----------------------|----------------------------------------|-------|-------|------|------|
| AcCa (20:4)                        | Acylcarnitine        | Fatty acid metabolism                  | 0.031 | -0.43 | 1.38 | Down |
| SM d36:0                           | Sphingomyelin        | Sphingolipid metabolism                | 0.038 | -0.39 | 1.24 | Down |
| SM d22:0/16:0                      | Sphingomyelin        | Sphingolipid metabolism                | 0.040 | -0.34 | 1.22 | Down |
| Cer d18:0/24:1                     | Ceramide             | Sphingolipid metabolism                | 0.021 | -0.34 | 1.14 | Down |
| Cer d18:1/18:0                     | Ceramide             | Sphingolipid metabolism                | 0.029 | -0.38 | 1.14 | Down |
| Cer d18:2/26:1                     | Ceramide             | Sphingolipid metabolism                | 0.037 | -0.32 | 1.22 | Down |
| S-3-oxodecanoyl cysteamine         | Fatty acid           | Linoleic acid metabolism               | 0.013 | -0.56 | 1.62 | Down |
| 13(S)-HODE                         | Fatty acid           | Linoleic acid metabolism               | 0.020 | 1.11  | 2.37 | Up   |
| 9(S)-HODE                          | Fatty acid           | Linoleic acid metabolism               | 0.025 | 1.07  | 2.34 | Up   |
| L-Glutamine                        | Amino acid           | Arginine biosynthesis                  | 0.006 | -0.34 | 1.41 | Down |
| N (6)-Methyllysine                 | Amino acid           | Lysine metabolism                      | 0.009 | -1.34 | 2.62 | Down |
| L-Lactic acid                      | Organic acid         | Glycolysis metabolism                  | 0.009 | -0.45 | 1.54 | Down |
| L-Malic acid                       | Organic acid         | TCA Cycle                              | 0.011 | -0.30 | 1.34 | Down |
| N1-Methyl-2-pyridone-5-carboxamide | Vitamin and Cofactor | Nicotinate and nicotinamide metabolism | 0.022 | -0.45 | 1.10 | Down |
| Phenylalanyl-Tryptophan            | Peptide              | organic amino metabolism               | 0.048 | -0.32 | 1.04 | Down |

9(S)-HODE, oxylipins 9-hydroxyoctadecadienoic acid; 13(S)-HODE, oxylipins 13-hydroxyoctadecadienoic acid.

**Table S2.** Metabolic pathway analysis of differential metabolites between SS and SR.

| Pathways                                            | Total Pathway Metabolites | Metabolite Hits | P     | Impact |
|-----------------------------------------------------|---------------------------|-----------------|-------|--------|
| Sphingolipid metabolism                             | 21                        | 3               | 0.003 | 0.31   |
| Pyruvate metabolism                                 | 22                        | 3               | 0.004 | 0.32   |
| Glyoxylate and dicarboxylate metabolism             | 32                        | 3               | 0.011 | 0      |
| Arginine biosynthesis                               | 14                        | 2               | 0.017 | 0.06   |
| Citrate cycle (TCA cycle)                           | 20                        | 2               | 0.034 | 0.09   |
| Phenylalanine, tyrosine and tryptophan biosynthesis | 4                         | 1               | 0.058 | 0.50   |
| Alanine, aspartate and glutamate metabolism         | 28                        | 2               | 0.063 | 0.11   |
| Linoleic acid metabolism                            | 5                         | 1               | 0.072 | 0      |
| D-Glutamine and D-glutamate metabolism              | 6                         | 1               | 0.086 | 0      |
| Nitrogen metabolism                                 | 6                         | 1               | 0.086 | 0      |
| Glycerophospholipid metabolism                      | 36                        | 2               | 0.098 | 0.11   |
| Arginine and proline metabolism                     | 38                        | 2               | 0.107 | 0.11   |
| Pyrimidine metabolism                               | 39                        | 2               | 0.112 | 0.02   |
| Ubiquinone and other terpenoid-quinone biosynthesis | 9                         | 1               | 0.126 | 0      |
| Tyrosine metabolism                                 | 42                        | 2               | 0.127 | 0.14   |
| Phenylalanine metabolism                            | 10                        | 1               | 0.139 | 0      |
| Aminoacyl-tRNA biosynthesis                         | 48                        | 2               | 0.158 | 0      |
| alpha-Linolenic acid metabolism                     | 13                        | 1               | 0.177 | 0      |
| Butanoate metabolism                                | 15                        | 1               | 0.202 | 0      |
| Nicotinate and nicotinamide metabolism              | 15                        | 1               | 0.202 | 0      |
| Glycerolipid metabolism                             | 16                        | 1               | 0.214 | 0.01   |
| Glycolysis / Gluconeogenesis                        | 26                        | 1               | 0.324 | 0.10   |
| Glutathione metabolism                              | 28                        | 1               | 0.344 | 0      |
| Glycine, serine and threonine metabolism            | 33                        | 1               | 0.392 | 0      |
| Cysteine and methionine metabolism                  | 33                        | 1               | 0.392 | 0      |

|                             |    |   |       |   |
|-----------------------------|----|---|-------|---|
| Arachidonic acid metabolism | 36 | 1 | 0.420 | 0 |
| Steroid biosynthesis        | 42 | 1 | 0.470 | 0 |
| Purine metabolism           | 65 | 1 | 0.629 | 0 |
| Steroid biosynthesis        | 42 | 1 | 0.527 | 0 |

**Table S3.** Results of metabolites related logistic regression models for SS.

| Metabolite    | Model 1 |             |              | Model 2 |             |              | Model 3 |             |              | Model 4 |             |              |
|---------------|---------|-------------|--------------|---------|-------------|--------------|---------|-------------|--------------|---------|-------------|--------------|
|               | OR      | 95% CI      | P            |
| TG 54:6       | 0.31    | (0.05,1.9)  | 0.205        | 0.27    | (0.04,1.73) | 0.168        | 0.29    | (0.05,1.83) | 0.187        | 0.24    | (0.04,1.6)  | 0.140        |
| GlcCer d41:1  | 0.09    | (0.01,0.59) | <b>0.013</b> | 0.09    | (0.01,0.63) | <b>0.015</b> | 0.08    | (0.01,0.55) | <b>0.010</b> | 0.08    | (0.01,0.58) | <b>0.013</b> |
| ChE 22:5n6    | 0.07    | (0.01,0.76) | <b>0.029</b> | 0.06    | (0.01,0.7)  | <b>0.024</b> | 0.06    | (0.01,0.75) | <b>0.029</b> | 0.05    | (0,0.66)    | <b>0.024</b> |
| ChE 20:3      | 0.12    | (0.02,0.83) | <b>0.032</b> | 0.13    | (0.02,0.94) | <b>0.043</b> | 0.08    | (0.01,0.69) | <b>0.021</b> | 0.09    | (0.01,0.79) | <b>0.030</b> |
| ChE 22:4      | 0.45    | (0.15,1.36) | 0.158        | 0.43    | (0.14,1.32) | 0.140        | 0.43    | (0.14,1.32) | 0.141        | 0.40    | (0.12,1.26) | 0.117        |
| ChE 18:0      | 0.77    | (0.19,3.18) | 0.721        | 0.77    | (0.19,3.2)  | 0.720        | 0.73    | (0.17,3.04) | 0.665        | 0.71    | (0.17,3.02) | 0.640        |
| ChE 22:5n3    | 0.05    | (0,0.61)    | <b>0.019</b> | 0.03    | (0,0.48)    | <b>0.014</b> | 0.03    | (0,0.51)    | <b>0.014</b> | 0.02    | (0,0.4)     | <b>0.010</b> |
| PC 32:1p      | 0.32    | (0.1,1.02)  | 0.055        | 0.28    | (0.08,0.94) | <b>0.040</b> | 0.30    | (0.09,0.99) | <b>0.049</b> | 0.25    | (0.07,0.88) | <b>0.031</b> |
| PC 16:0/16:1  | 0.43    | (0.19,0.97) | <b>0.043</b> | 0.40    | (0.17,0.94) | <b>0.035</b> | 0.41    | (0.18,0.93) | <b>0.033</b> | 0.37    | (0.15,0.87) | <b>0.023</b> |
| PC 16:1/14:0  | 0.05    | (0.01,0.48) | <b>0.009</b> | 0.04    | (0,0.42)    | <b>0.007</b> | 0.06    | (0.01,0.49) | <b>0.009</b> | 0.04    | (0,0.43)    | <b>0.007</b> |
| PC 38:3e      | 0.50    | (0.23,1.07) | 0.075        | 0.47    | (0.21,1.04) | 0.062        | 0.47    | (0.21,1.04) | 0.063        | 0.42    | (0.18,0.99) | <b>0.047</b> |
| PC 17:1/14:0  | 0.23    | (0.04,1.4)  | 0.112        | 0.22    | (0.04,1.36) | 0.102        | 0.23    | (0.04,1.41) | 0.112        | 0.22    | (0.03,1.37) | 0.104        |
| PC 16:0/18:1  | 0.44    | (0.16,1.21) | 0.111        | 0.41    | (0.14,1.18) | 0.097        | 0.41    | (0.15,1.15) | 0.090        | 0.37    | (0.12,1.1)  | 0.073        |
| PC 30:0       | 0.26    | (0.05,1.31) | 0.102        | 0.20    | (0.03,1.16) | 0.073        | 0.22    | (0.04,1.18) | 0.077        | 0.14    | (0.02,0.96) | <b>0.046</b> |
| PC 30:1e      | 0.19    | (0.03,1.24) | 0.082        | 0.13    | (0.02,0.99) | <b>0.049</b> | 0.17    | (0.02,1.16) | 0.070        | 0.11    | (0.01,0.9)  | <b>0.039</b> |
| PC 18:0p/14:0 | 0.52    | (0.13,2.08) | 0.357        | 0.50    | (0.12,1.99) | 0.322        | 0.54    | (0.13,2.17) | 0.384        | 0.51    | (0.12,2.07) | 0.343        |
| PC 14:0/18:2  | 0.65    | (0.36,1.19) | 0.163        | 0.64    | (0.35,1.18) | 0.150        | 0.63    | (0.34,1.16) | 0.141        | 0.61    | (0.32,1.14) | 0.123        |
| PC 15:0/14:0  | 0.49    | (0.15,1.59) | 0.237        | 0.47    | (0.14,1.56) | 0.220        | 0.47    | (0.14,1.54) | 0.211        | 0.44    | (0.13,1.5)  | 0.189        |

|                                    |      |             |              |      |             |              |      |              |              |      |              |              |
|------------------------------------|------|-------------|--------------|------|-------------|--------------|------|--------------|--------------|------|--------------|--------------|
| PC 17:1/16:0                       | 0.39 | (0.11,1.32) | 0.129        | 0.39 | (0.11,1.39) | 0.147        | 0.36 | (0.1,1.27)   | 0.111        | 0.37 | (0.1,1.34)   | 0.129        |
| PC 20:4/22:6                       | 4.17 | (1.46,11.9) | <b>0.008</b> | 4.11 | (1.43,11.8) | <b>0.009</b> | 4.10 | (1.46,11.49) | <b>0.007</b> | 4.03 | (1.44,11.29) | <b>0.008</b> |
| Sphingosine 1-phosphate            | 0.07 | (0.01,0.44) | <b>0.005</b> | 0.06 | (0.01,0.41) | <b>0.004</b> | 0.07 | (0.01,0.45)  | <b>0.005</b> | 0.06 | (0.01,0.4)   | <b>0.004</b> |
| AcCa 20:3                          | 0.20 | (0.04,0.89) | <b>0.035</b> | 0.18 | (0.04,0.84) | <b>0.030</b> | 0.20 | (0.04,0.91)  | <b>0.038</b> | 0.18 | (0.04,0.87)  | <b>0.033</b> |
| AcCa 20:2                          | 0.33 | (0.07,1.52) | 0.154        | 0.24 | (0.05,1.25) | 0.090        | 0.35 | (0.07,1.62)  | 0.179        | 0.25 | (0.05,1.34)  | 0.106        |
| AcCa (5:0)                         | 0.27 | (0.07,0.98) | <b>0.047</b> | 0.25 | (0.07,0.95) | <b>0.042</b> | 0.25 | (0.07,0.95)  | <b>0.042</b> | 0.23 | (0.06,0.9)   | <b>0.035</b> |
| AcCa (20:4)                        | 0.53 | (0.18,1.62) | 0.266        | 0.36 | (0.1,1.29)  | 0.116        | 0.54 | (0.18,1.66)  | 0.284        | 0.32 | (0.08,1.26)  | 0.104        |
| SM d36:0                           | 0.41 | (0.1,1.72)  | 0.223        | 0.23 | (0.04,1.25) | 0.089        | 0.43 | (0.1,1.85)   | 0.259        | 0.23 | (0.04,1.27)  | 0.092        |
| SM d22:0/16:0                      | 0.23 | (0.05,1.05) | 0.057        | 0.17 | (0.03,0.83) | <b>0.029</b> | 0.20 | (0.04,0.96)  | <b>0.044</b> | 0.13 | (0.02,0.69)  | <b>0.017</b> |
| Cer d18:0/24:1                     | 0.50 | (0.15,1.68) | 0.259        | 0.36 | (0.09,1.42) | 0.147        | 0.49 | (0.14,1.68)  | 0.257        | 0.33 | (0.08,1.33)  | 0.119        |
| Cer d18:1/18:0                     | 0.32 | (0.07,1.38) | 0.127        | 0.26 | (0.06,1.18) | 0.082        | 0.31 | (0.07,1.38)  | 0.123        | 0.25 | (0.05,1.16)  | 0.077        |
| Cer d18:2/26:1                     | 0.28 | (0.08,1.03) | 0.055        | 0.29 | (0.08,1.08) | 0.064        | 0.25 | (0.07,0.97)  | <b>0.046</b> | 0.26 | (0.07,1.03)  | 0.054        |
| S-3-oxodecanoyl cysteamine         | 2.74 | (1.23,6.09) | <b>0.014</b> | 3.21 | (1.31,7.87) | <b>0.011</b> | 2.70 | (1.22,6.01)  | <b>0.015</b> | 3.27 | (1.31,8.12)  | <b>0.011</b> |
| 13(S)-HODE                         | 2.27 | (1.14,4.53) | <b>0.020</b> | 2.58 | (1.21,5.49) | <b>0.014</b> | 2.25 | (1.13,4.47)  | <b>0.021</b> | 2.60 | (1.22,5.53)  | <b>0.013</b> |
| 9(S)-HODE                          | 0.01 | (0,0.21)    | <b>0.003</b> | 0.01 | (0,0.23)    | <b>0.003</b> | 0.01 | (0,0.2)      | <b>0.003</b> | 0.01 | (0,0.22)     | <b>0.004</b> |
| L-Glutamine                        | 0.54 | (0.31,0.95) | <b>0.031</b> | 0.56 | (0.32,0.98) | <b>0.042</b> | 0.52 | (0.29,0.93)  | <b>0.027</b> | 0.54 | (0.3,0.97)   | <b>0.038</b> |
| N (6)-Methyllysine                 | 0.12 | (0.02,0.63) | <b>0.012</b> | 0.13 | (0.02,0.66) | <b>0.014</b> | 0.11 | (0.02,0.57)  | <b>0.009</b> | 0.11 | (0.02,0.59)  | <b>0.010</b> |
| L-Lactic acid                      | 0.07 | (0.01,0.58) | <b>0.013</b> | 0.07 | (0.01,0.63) | <b>0.017</b> | 0.07 | (0.01,0.54)  | <b>0.011</b> | 0.07 | (0.01,0.6)   | <b>0.015</b> |
| L-Malic acid                       | 0.45 | (0.17,1.23) | 0.119        | 0.28 | (0.09,0.9)  | <b>0.033</b> | 0.48 | (0.17,1.32)  | 0.153        | 0.30 | (0.09,0.97)  | <b>0.045</b> |
| N1-Methyl-2-pyridone-5-carboxamide | 0.30 | (0.07,1.33) | 0.113        | 0.30 | (0.07,1.37) | 0.120        | 0.31 | (0.07,1.36)  | 0.120        | 0.30 | (0.06,1.43)  | 0.132        |
| Phenylalanyl-Tryptophan            | 0.89 | (0.36,2.19) | 0.806        | 0.89 | (0.35,2.23) | 0.796        | 0.87 | (0.35,2.18)  | 0.770        | 0.84 | (0.32,2.22)  | 0.729        |

Model1 adjusted for age, gender, smoking, drinking, LDL-C, HDL-C and hypertension. Model2 adjusted for age, gender, smoking, drinking, LDL-C, HDL-C, hypertension and BMI. Model3 adjusted for age, gender, smoking, drinking, LDL-C, HDL-C, hypertension and salt intake. Model4 adjusted for age, gender, smoking, drinking, LDL-C, HDL-C, hypertension, BMI and salt intake. Bold indicates the significance level is 0.05 for SS, saline load period and diuresis shrinkage period.

**Table S4.** ROC analysis of SS.

| Metabolite                      | AUC  | 95% CI      | <i>P</i> | Sensitivity | 95% CI      | Specificity | 95% CI      |
|---------------------------------|------|-------------|----------|-------------|-------------|-------------|-------------|
| <b>single-metabolite models</b> |      |             |          |             |             |             |             |
| TG 54:6                         | 0.83 | (0.71,0.95) | <0.001   | 0.76        | (0.59,0.93) | 0.89        | (0.76,1.00) |
| ChE 22:5n6                      | 0.82 | (0.7,0.93)  | <0.001   | 0.6         | (0.41,0.79) | 0.92        | (0.82,1.00) |
| ChE 20:3                        | 0.82 | (0.7,0.94)  | <0.001   | 0.92        | (0.81,1.00) | 0.62        | (0.43,0.8)  |
| ChE 22:4                        | 0.79 | (0.67,0.92) | <0.001   | 0.8         | (0.64,0.96) | 0.69        | (0.52,0.87) |
| PC 32:1p                        | 0.81 | (0.68,0.93) | <0.001   | 0.56        | (0.37,0.76) | 0.96        | (0.89,1.00) |
| PC 16:1/14:0                    | 0.79 | (0.67,0.92) | <0.001   | 0.96        | (0.88,1.00) | 0.54        | (0.35,0.73) |
| PC 38:3e                        | 0.83 | (0.72,0.95) | <0.001   | 0.72        | (0.54,0.9)  | 0.85        | (0.71,0.99) |
| Sphingosine 1-phosphate         | 0.82 | (0.71,0.94) | <0.001   | 0.92        | (0.81,1.00) | 0.62        | (0.43,0.8)  |
| AcCa 20:3                       | 0.84 | (0.73,0.95) | <0.001   | 0.72        | (0.54,0.9)  | 0.89        | (0.76,1.00) |
| AcCa 20:2                       | 0.81 | (0.68,0.93) | <0.001   | 0.84        | (0.7,0.98)  | 0.77        | (0.61,0.93) |
| AcCa 20:4                       | 0.81 | (0.68,0.93) | <0.001   | 0.8         | (0.64,0.96) | 0.81        | (0.66,0.96) |
| 13S-hydroxyoctadecadienoic acid | 0.81 | (0.69,0.94) | <0.001   | 0.96        | (0.88,1.00) | 0.65        | (0.47,0.84) |
| Alpha-dimorphcolic acid         | 0.81 | (0.68,0.93) | <0.001   | 0.96        | (0.88,1.00) | 0.58        | (0.39,0.77) |
| L-Glutamine                     | 0.88 | (0.78,0.97) | <0.001   | 0.88        | (0.75,1.00) | 0.77        | (0.61,0.93) |
| N (6)-Methyl lysine             | 0.80 | (0.67,0.92) | <0.001   | 0.92        | (0.81,1.00) | 0.58        | (0.39,0.77) |
| L-Lactic acid                   | 0.83 | (0.71,0.94) | <0.001   | 0.76        | (0.59,0.93) | 0.77        | (0.61,0.93) |
| L-Malic acid                    | 0.81 | (0.7,0.93)  | <0.001   | 0.96        | (0.88,1.00) | 0.54        | (0.35,0.73) |
| <b>multi-metabolites model</b>  |      |             |          |             |             |             |             |
| ChE 22:5n6                      | 0.96 | (0.91,1.00) | <0.001   | 0.96        | (0.88,1.00) | 0.85        | (0.71,0.98) |
| L-Glutamine                     |      |             |          |             |             |             |             |

Adjusted for age, gender, smoking, drinking, LDL-C, HDL-C and hypertension.

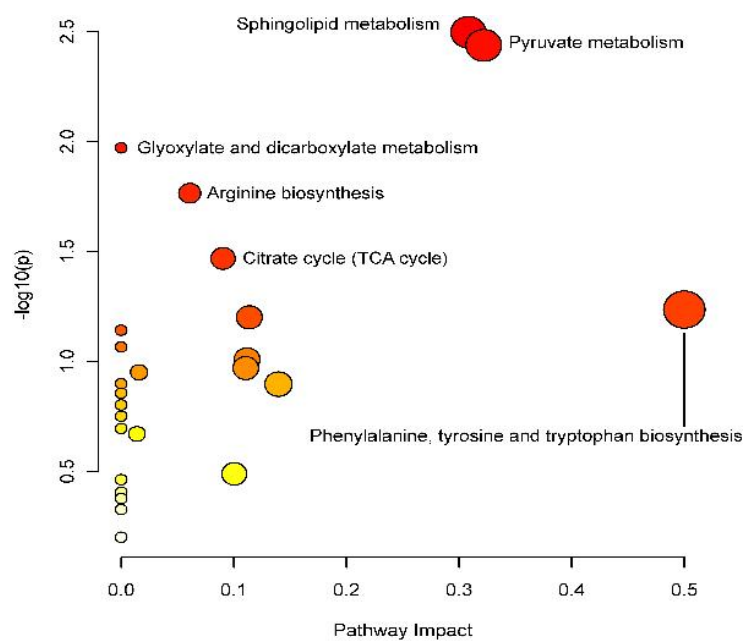

**Figure S1.** Metabolic pathway analysis of differential metabolites between SS and SR.
